# Supplementary material for: GPROF-NN: A neural network based implementation of the Goddard Profiling Algorithm
Source: Copernicus journal article supplement (doi:10.5194/amt-2022-15), 2022-04-06
Supplement: Supplementary file [file amt-2022-15-AC1-supplement.pdf]

# GPROF-NN: A neural network based implementation of the Goddard Profiling Algorithm

Response to reviewer comments

# 1 Comments from reviewer 1

We want to thank the reviewer for taking the time to read our manuscript and provide valuable feedback.

## 1.1 Principal changes

Many comments from both reviewers were related to the description of the generation of the training data and the implementation of the retrievals. In order to address these comments and avoid excessive growth of the main text of the manuscript, we have added appendices that explain the generation of the training data, the training itself and the application of the retrievals. We have also rewritten much of Sec. 1 and 2 to improve the presentation of both the scope of the manuscript and the design of the GPROF-NN retrievals.

In addition to that, an error in the simulated brightness temperatures for MHS was discovered and corrected. We have updated the results for MHS. While this improved the overall accuracy of the retrieval, it did not affect the study's main findings. Furthermore, we identified and corrected a minor issue in our evaluation of GPROF that caused a slight overestimation of its accuracy. Again, this correction did not affect the conclusions of the paper.

## 1.2 Specific comments

### Reviewer comment 1

Many of your readers may not be familiar with NNs terminology. Would you please highlight the advantages of the NNs, e.g., related CNN and QRNN methods, that today are popular in the satellite precipitation community compared to other ML techniques.

### Author response:

We will add two paragraphs to the introduction, which discuss the advantages of neural networks for remote sensing retrievals in general as well as the specific advantages of CNNs and QRNNs.

### Changes in manuscript:

#### Changes starting in line 64:

While GPROF is currently based on a data-driven method to solve Bayesian inverse problems, more general machine learning techniques have recently gained popularity for application in precipitation retrievals. Deep neural networks ~~have led to (DNNs), which have enabled~~ a number of ~~important break-throughs in the fields of computer vision, natural language processing and artificial intelligence. They have also gained popularity for remote sensing retrievals of precipitation.~~ ~~significant breakthroughs~~ in different scientific fields (Silver et al., 2016; Jumper et al., 2021), have in recent years been explored for retrieving precipitation from satellite observations. Especially convolutional neural networks (CNNs) are appealing for this application because of their ability to leverage spatial patterns in image data. This property sets them apart from traditional retrieval methods and shallow machine-learning techniques, which are limited in their ability to use this information by computational complexity (Duncan et al., 2019) or the need for feature engineering or manual incorporation of spatial information through techniques such as convective-stratiform discrimination (Gopalan et al., 2010).

#### Changes starting in line 97:

The proposed algorithms are based on quantile regression neural networks (QRNNs, Pfreundschuh et al., 2018), which can be used to predict the posterior distribution of a Bayesian solution of the retrieval, given that the assumed a priori distribution of the Bayesian solution is the same as the distribution of neural network's training data. Because of this, the GPROF-NN ~~implementations is assessed on~~ retrievals can produce all of GPROF's retrieval outputs, which include a probability of precipitation and an uncertainty estimate of the predicted precipitation in the form of terciles of the posterior distribution.

### Reviewer comment 2

As mentioned before, the study lacks an adequate review of the recent literature about using NNs for satellite precipitation estimation. I suggest some relevant papers (but are not limited to) that are worth reviewing. Please briefly explain already published works in the literature, their challenges/their methodologies, etc., and mention how your work is different from them. What are the open questions you try to address that the previous studies have not considered? As an example, in Lines 65-70: I understand that you specifically explore the potentials for NNs algorithm in GPROF, so please acknowledge other studies that have already discussed using spatial features in retrieving precipitation.

- Li, Z., Wen, Y., Schreier, M., Behrangi, A., Hong, Y. and Lambrigtsen, B., 2021. Advancing satellite precipitation retrievals with data-driven approaches: Is black box model explainable?. Earth and Space Science, 8(2), p.e2020EA001423.

- Afzali Goroooh, V., Akbari Asanjan, A., Nguyen, P., Hsu, K. and Sorooshian, S., 2022. Deep neural network high SpatioTEmporal resolution Precipitation estimation (Deep-STEP) using Passive Microwave and Infrared Data. *Journal of Hydrometeorology*.
- Sanò, P., Panegrossi, G., Casella, D., Marra, A.C., D'Adderio, L.P., Rysman, J.F. and Dietrich, S., 2018. The passive microwave neural network precipitation retrieval (PNPR) algorithm for the CONICAL scanning Global Microwave Imager (GMI) radiometer. *Remote Sensing*, 10(7), p.1122.
- Ehsani, M.R., Zarei, A., Gupta, H.V., Barnard, K., Lyons, E. and Behrangi, A., 2022. NowCasting-nets: Representation Learning to Mitigate Latency Gap of Satellite Precipitation Products using Convolutional and Recurrent Neural Networks. *IEEE Transactions on Geoscience and Remote Sensing*.

**Author response:**

We agree with the reviewer that the discussion of previous work on precipitation retrieval with neural networks was insufficient in the first version of the manuscript. We will add a brief summary of previous work to the introduction and discuss the relevant differences to our work.

## Changes in manuscript:

### Changes starting in line 72:

~~This study investigates the benefits of using the GPROF retrieval database to train a neural network. Shallow neural networks have long been used to retrieve precipitation and hydrometeor profiles. Since the retrieval database has grown to a size of several hundred million entries it is perfectly suited for the application of deep neural networks, which scale very well to large amounts of data and are capable of learning complex relationships from them. In addition to this, a neural network based implementation has the advantage of allowing the integration of spatial information into from PMW observations (Staelin and Chen, 2000; Surussavadee and Staelin, 2008). The Passive microwave Neural network Precipitation Retrieval (PNPR) presented in Sanò et al. (2015); Sanò et al. (2016); Sanò et al. (2018) and the work by Tang et al. (2018) are among the more recent algorithms that use neural networks for retrieving precipitation from PMW observations. They employ relatively shallow neural networks and retrieve precipitation in a pixel-wise manner, thus neglecting spatial structure of the observations. Other recent work demonstrates the ability of CNNs to leverage spatial information in satellite observations. Examples of this are IR-based retrievals by Sadeghi et al. (2019), PMW-based precipitation detection (Li et al., 2021) and retrievals combining PMW with IR observations (Gorooh et al., 2022) and gauge measurements (Moraux et al., 2019).~~

~~A shortcoming of the aforementioned studies is that none of them addresses the inherent uncertainty of the precipitation retrievals. Retrieving precipitation from PMW observations constitutes an inverse problem, whose ill-posed character leads to significant uncertainties in the retrieval results. Traditionally, these uncertainties are handled using Bayesian statistics. However, because the algorithms mentioned above neglect the probabilistic character of the retrieval, which is not as easily feasible with the current method. This study thus aims to answer the following two questions:-~~

- ~~1. Can a deep learning based retrieval method with identical inputs improve the accuracy of retrieved surface precipitation and vertical hydrometeor profiles?-~~
- ~~2. Can the incorporation of spatial information into the retrieval help to improve the retrievals?-~~

~~there is no way to reconcile them with the Bayesian approach.~~

~~To answer these questions, this study presents two novel, neural network based implementations of the GPROF algorithm. Moreover, existing precipitation retrievals that make use of DNNs (Moraux et al., 2019; Sadeghi et al., 2019; Li et al., 2021; Gorooh et al., 2022) are experimental retrievals that are currently not used operationally. The design of an operational retrieval algorithm for the GPM PMW observations needs to address a number of additional requirements, such as the handling of observations from different sensors and the retrieval of multiple output variables. Furthermore, because~~

GPM is an ongoing mission, continuity of the output variables must be ensured, which further constrains the design of the retrieval algorithm.

### Reviewer comment 3

Lines 13 and 435: How do you define accuracy? Please elaborate on the reported improvements.

#### Author response:

We will rewrite the sentences to clearly state the observed improvements in the various metrics.

#### Changes in manuscript:

##### Changes starting in line 14:

precipitation retrievals. Despite using the same input information as GPROF, the GPROF-NN algorithms and the development of the current GPROF algorithm. Comparison of GPROF and the GPROF-NN 1D algorithm shows that by replacing GPROF with an identical neural network based retrieval retrieval improves the accuracy of the retrieved surface precipitation from for the GPM Microwave Imager (GMI) can be improved by 10 to 25% from  $0.079 \text{ mmh}^{-1}$  to  $0.059 \text{ mmh}^{-1}$  in terms of absolute error, root mean squared error and mean absolute error (MAE), from 76.1 % to 69.5 % in terms of symmetric mean absolute percentage error (SMAPE) and from 0.797 to 0.847 in terms of correlation. The improvements for the Microwave Humidity Sounder (MHS) are from  $0.085 \text{ mmh}^{-1}$  to  $0.061 \text{ mmh}^{-1}$  in terms of MAE, from 81 % to 70.1 % for SMAPE and from 0.724 to 0.804 in terms of correlation. Comparable improvements are observed found for the retrieved hydrometeor profiles and their column integrals. The improvements are consistent spatially as well as with respect to different surface types. The effective resolution in along track direction of the retrieved surface precipitation fields is increased from 23 km to 14 km. Similar, additional improvements are found for the the detection of precipitation. Moreover, the ability of the retrievals to resolve small-scale variability is improved by more than 40 % for GMI and 29 % for MHS. The GPROF-NN 3D retrieval over the performance of the GPROF-NN 1D retrieval, showing the added benefits of incorporating structural information into the retrieval. The effective resolution in along-track direction of the GPROF-NN 3D algorithm is reduced to 13.5 km, which is the upper limit imposed by the along track separation of consecutive scan lines. Comparable improvements are found also when the algorithms are applied to synthetic observations from the cross track scanning Microwave Humidity Sounder (MHS) sensor. retrieval further improves the MAE to  $0.043 \text{ mmh}^{-1}$ , the SMAPE to  $48.67 (\text{mmh}^{-1})^2$  and the correlation to 0.897 for GMI and  $0.043 \text{ mmh}^{-1}$ ,  $0.112 (\text{mm h}^{-1})^2$  and 0.83 for MHS.

#### Changes starting in line 483:

The second important finding from this study is that by extending the retrieval to incorporate structural information, its accuracy can be further improved by ~~another 10 to 25 %~~ about 20 % in terms of MAE, MSE and SMAPE and 5 % in terms of correlation compared to the GPROF-NN 1D retrieval at the same time as the effective resolution in along track direction is decreased to its lower limit of 13.5 km for GMI and improved by 70 % for MHS.

#### Reviewer comment 4

Line 15: how do you see the spatial consistency in precipitation retrievals? Does this sentence refer to visualization of derived precipitation rates over Hurricane Harvey for one or two orbital tracks? Please report some statistics for the general spatial detection skills of your proposed models.

#### Author response:

The sentence that the reviewer is referring to was badly formulated. It was meant to refer to Fig. 9 and A1 from the original manuscript, which show that the improvements are consistent across the globe. However, since we consider this information to be of minor importance we will remove it from the revised version of the manuscript.

#### Changes in manuscript

- The sentence will be removed from the manuscript.

#### Reviewer comment 5

Lines 25, Section 3.3: I think the authors need to be cautious in reporting processing time and computational cost comparisons. It is obvious that pixel-wise predictions are faster compared to convolutional-based systems when models are trained and are ready to use. I mean the comparison between GPROF and NN 1D makes sense but including NN 3D is ‘Comparing Apples to Oranges’. Processing time means when we have everything set up and ready, let’s say we receive one or more orbital tracks (different channels have different footprints, etc.), how long does it take from getting a set of brightness temperatures (Level 1 product) to get the corresponding precipitation maps.

#### Author response:

The reported processing time measure exactly what the reviewer is requesting, i.e., the time required to process a full orbit of L1C observations augmented with ancillary data. Input and output data are the same for all retrievals and the processing time includes reading and writing of the data. The times are therefore directly comparable.

It seems that this has not been made sufficiently clear in the manuscript. We will rewrite the paragraph to emphasize that the timings are, in fact, comparable.

#### Changes in manuscript:

##### Changes starting in line 401:

~~Another relevant question regarding the retrieval algorithm is the computational cost of processing the satellite observations. Since GPROF is used operationally on to process~~ PMW observations from a constellation of sensors spanning several decades of observations. ~~Therefore,~~ the processing time must not be excessively high. Although neural networks are ~~known-known~~ to be efficient to evaluate, this often assumes dedicated hardware, which ~~is not yet can not yet be expected to be~~ available at the processing centers. ~~We therefore evaluated~~

~~We measure~~ the processing time ~~that is required for a retrieval of an~~ required for ~~retrieving precipitation from a full~~ orbit of observations using a single CPU core of ~~an Intel Xeon Gold 6234 CPU to assess the computational complexity of the three retrievals. The processing time here includes all steps from reading a GPROF input file to writing the corresponding output file. The input and output files are the same for all three algorithms, excluding, of course, differences in the retrieval results. The results-~~

~~The results~~ are displayed in Fig. 8. ~~Despite their superior retrieval accuracy, The processing of a single GMI file takes about 4 minutes for GPROF but only about 2 minutes for the GPROF-NN algorithms are about twice as fast as GPROF for GMI and MHS retrievals. Because of the lower number of pixels in a single orbit, all retrievals are significantly faster for MHS. However, also here the GPROF-NN retrievals are significantly faster than GPROF. This shows that, even in the absence of dedicated hardware, the GPROF-NN retrievals process observations faster than the current implementation.~~

#### Reviewer comment 6

The data preprocessing steps are not clear in the methodology. I suggest summarizing all the training process and prediction (here means after train and validation stage) steps in a numbered list, especially for the CNN algorithm in the methodology section.

#### Author response:

We will add descriptions of the training and evaluation processes of the GPROF-NN retrievals to the manuscript. However, to avoid excessively increasing the length of the manuscript's main text, we will add these sections to the appendix.



### Changes in manuscript:

- Section B2 will be added to the appendix, which describes the training processes for the GPROF-NN retrievals.
- Section B3 will be added to the appendix, which describes the retrieval processing of the GPROF-NN algorithms.

### Reviewer comment 7

Data and method Section: Please clearly explain how many channels are used as inputs to the NN models? What type of resampling/rescaling/interpolation methods do you use? Different radiometers/imagers/sounders have different bands and resolutions, how do you address this problem?

### Author response:

The GPROF-NN retrieval use the same channels as GPROF and don't apply any interpolation apart what is done anyways by the GPROF preprocessing software. We will add a paragraph with this information as well as a table with the channels of the GMI and MHS sensors used in the study to the manuscript.

### Changes in manuscript:

- Tab. 1.1 will be added to Sec. 2.1 of the manuscript, which shows the channels of the GMI and MHS sensors that are used in this study. In addition to that, the following paragraph will be added to Sec. 2.1 which discusses the handling of different channels in the retrieval database.

#### Changes starting in line 135:

Since the available channels and the viewing geometries vary between the sensors of the GPM constellation, a separate database is generated for each sensor type. A crucial difference between the retrieval databases for GMI and the other sensors of the GPM constellation is that the database for GMI uses real observations, while the databases for the other sensors are constructed using simulations. The varying resolutions and viewing geometries of different sensors are taken into account by resampling and averaging the simulated observations and retrieval results to the observation footprints of the corresponding sensor. The channels of the GMI and MHS sensors that are used in this study are listed in Tab. 1.1.

- We will rewrite the first paragraph of Sec. 2.3 as follows.

### Changes starting in line 163:

The principal objective guiding the design of the GPROF-NN algorithms was to develop a ~~neural-network retrieval that provides the exact~~ neural-network-based retrieval that operates on the same input data and provides the same output as GPROF so that it can ~~potentially~~ replace the current implementation in a future update. Although GPROF's retrieval scheme is defined on independent pixels, the algorithm operates on full orbits of observations and corresponding ancillary data. Both GPROF-NN retrievals therefore operate on the same input format as GPROF, which corresponds to each sensor's level 1C observations in their native spatial sampling, which, where required, is remapped to a common grid.

Table 1.1: Channels of the GMI and MHS sensors used for the retrievals in this study.

| Channel | Freq. [GHz] | Pol. |  | Sensor | Freq. [GHz] | Pol. |
|---------|-------------|------|--|--------|-------------|------|
| GMI-1   | 10.6        | V    |  |        |             |      |
| GMI-2   | 10.6        | H    |  |        |             |      |
| GMI-3   | 18.7        | V    |  |        |             |      |
| GMI-4   | 18.7        | H    |  |        |             |      |
| GMI-5   | 23          | V    |  | MHS-1  | 89          | V    |
| GMI-6   | 37          | V    |  | MHS-2  | 157         | V    |
| GMI-7   | 37          | H    |  | MHS-3  | $183 \pm 1$ | H    |
| GMI-8   | 89          | V    |  | MHS-4  | $183 \pm 3$ | H    |
| GMI-9   | 89          | H    |  | MHS-5  | 190.31      | V    |
| GMI-10  | 166         | V    |  |        |             |      |
| GMI-11  | 166         | H    |  |        |             |      |
| GMI-12  | $183 \pm 3$ | V    |  |        |             |      |
| GMI-13  | $183 \pm 7$ | V    |  |        |             |      |

### Reviewer comment 8

How do you define 18 surface types? Are they generated by TELSEM classification algorithm? Please provide a clear picture of the source of data, pre-processing steps, etc. in this section. Background material for GPROF Algorithm is well described and cited in previous papers. So please summarize Section 2.2 and please explain more about the innovative parts of your investigation and the proposed models.

### Author response:

The surface type information used by GPROF is described in detail in the ATBD. Instead of repeating the content of the ATBS in the manuscript, we will include a reference in the description of the retrieval database.

We will replace Sec. 2.2 with a brief summary and move the detailed description of GPROF to the appendix.

### Changes in manuscript

- We will add the following paragraph to the end of Sec. 2.1

#### Changes starting in line 108:

A detailed description of the retrieval data base and the derivation of the data it contains can found in the GPROF ATBD (Passive Microwave Algorithm Team Facility, 2022). The training data for the GPROF-NN retrievals consists of the data from the GPROF retrieval database. To simplify the loading of the data during training it is brought into an intermediate format, which is described in detail in Sec. B1 in the appendix.

- Sec. 2.2 is moved to Sec. A1 in the appendix and replaced with the following summary.

#### Changes starting in line 110:

The current implementation of GPROF uses a Bayesian scheme to retrieve precipitation and hydrometeor profiles, which works by resampling the profiles in the database based on the similarity of the observations and ancillary data. GPROF uses ancillary data to split the database into separate bins. This reduces the number of profiles for which weights must be computed and helps to constrain the retrieval. Moreover, the profiles in each bin are clustered to limit the number of profiles that need to be processed. A detailed description of the implementation of GPROF is provided in Sec. A in the appendix.

### Reviewer comment 9

Please define all acronyms just the first time you use them. Then use the acronyms in the rest of the manuscript.

#### Author response:

We will revise the manuscript to make the use of acronyms more consistent.

### Reviewer comment 9

Line 200: How many trainable parameters do the NNs algorithms have? Is one year of information enough for training and validating the models?

### Author response:

The GPROF-NN 1D model has about 5 million, and the GPROF-NN 3D model has about 25 million parameters. The training data contains about 2 billion pixels with precipitation information. The fact that the trained models generalize well to unseen test data suggests that it is possible to train these models sufficiently well with the available data.

The number of pixels used to evaluate the retrievals varies between 50 and 3 million for different sensors and retrieval types. Although the samples are not independent, we expect the number to be large enough to yield reliable statistics.

### Change in manuscript

- We will add the numbers of parameters and sizes of the training datasets to the appendix.
- We will add the table shown in Tab. 1.2 containing the number of pixels used for the evaluation to the beginning of Sec. 3.1.
- We will add the following paragraph to the beginning of Sec. 3.1:

#### Changes starting in line 288:

Tab. 1.2 lists the number of pixels with precipitation information used for the testing of the retrievals. Spatially contiguous scenes of the same size as the ones used during training are used for the evaluation of GPROF-NN 3D retrievals. Since these scenes generally may not cover all of the pixels with precipitation information, the test data for the GPROF-NN 3D retrievals contains less pixels that can be used for the evaluation. The lower number of test pixels for MHS is due the coarser resolution of the observations which leads to a smaller number of observations over sea-ice and snow and an additional reduction of the pixels available for evaluation of the GPROF-NN 3D retrieval.

Table 1.2: The number of pixels with precipitation information in the test datasets used to evaluate the retrievals.

| Sensor | GPROF & GPROF-NN 1D | GPROF-NN 3D |
|--------|---------------------|-------------|
| GMI    | 50 435 584          | 14 218 203  |
| MHS    | 24 975 877          | 4 945 165   |

### Reviewer comment 11

Line 220: Please add some information about the training stage of models. For example, what are the size of 3D inputs to the CNN model in the training stage? how do you pre-process data to come up with input training samples?

**Author response:**

To provide a fuller picture of the training processes for the GPROF-NN retrievals, we will include a dedicated section in the appendix and move all information related to the training there.

**Changes in manuscript:**

- We will add a detailed description of the training processes for the retrievals to Sec. B2 in the appendix, which contains the information requested by the reviewer.

**Reviewer comment 11**

Figure 5. Define regions A and B in the figure. Please explain the augmentation process in the training stage of CNN model development.

**Author response:**

We will add the missing labels for the two regions. A detailed description of the augmentation process will be provided in the appendix.

**Changes in manuscript:**

- We have updated Fig. 5 in the manuscript, which now looks as shown in Fig. 1.1
- We will include a detailed description of the augmentation process in Sec. B2.3 the appendix.

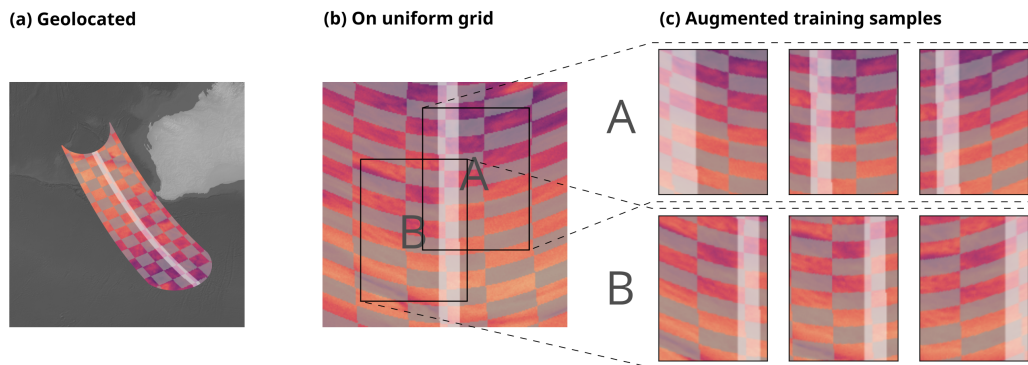

Figure 1.1: The updated Fig. 5, which will be included in the revised manuscript.

## Reviewer comment 12

Figures 6 and 7. I do not see a good reason for the color used in these figures, and I find it confusing, commonly blue-red colors would reveal more features. Please find similar figures as the example in Utsumi et al 2020 paper. Also, please report some common statistical indices (related to scatterplots) or detection skill metrics to reveal the discrepancies/improvements. It is better to judge the performance based on statistical indices along with visual assessments. 3 - Utsumi, N., Turk, F.J., Haddad, Z.S., Kirstetter, P.-E., Kim, H., 2020. Evaluation of Precipitation Vertical Profiles Estimated by GPM-Era Satellite-Based Passive Microwave Retrievals. *Journal of Hydrometeorology* 22, 95–112. <https://doi.org/10.1175/JHM-D-20-0160.1>

### Author response:

It seems that Utsumi et al. (2021) use a spectral colormap that is similar or identical to the 'jet' colormap in their scatter plots. We would like to point out that the 'jet' colormap visually distorts the displayed data due to its non-linear and non-monotonic lightness profile (Thyng et al., 2016). The colormap that is used in the manuscript is perceptually uniform and ordered (matplotlib, 2022). This should make the color map less confusing and less misleading and is in accordance with general guidelines for data visualization (Borland and Ii, 2007).

Since we are not aware of any objective criteria that would justify the use of the 'jet' color map, we will keep the current color map in the revised version of the manuscript. The manuscript already reports a range of common statistical indices (Bias, MSE, MAE, SMAPE) to assess the accuracy of the retrieval. To provide an additional metric that is related to scatter plots, we will extend this to include the correlation.

We will, however, not include detection metrics here because the detection of precipitation is handled by the probability of precipitation and precipitation flag outputs of GPROF. These are evaluated separately in Sec. 3.1.2 of the manuscript.

### Changes in manuscript:

- We will add the correlation to tables 2, 3, A1, A2, A3, A4, A6, A7, A8 as well as Fig. 8.

## Reviewer comment 13

Figure 7: What are the vertical white lines in the last panel of the figure? (Lowest right scatter plot)?

### Author response:

The white lines in the scatter plot were caused by missing test samples at the corresponding cloud water path values. Because the input data for the GPROF-NN 3D retrieval must be assembled into spatially coherent scenes, the test data can't be fully identical to

that used for GPROF and the GPROF-NN 1D retrievals. This is why the missing values only occurred for the results of the GPROF-NN 3D retrieval.

For the revised manuscript we will ensure that the bin sizes for the scatter plots are chosen in a way to avoid these white lines in the revised version of the manuscript.

**Changes in manuscript:**

- Fig. 7 has been updated and now looks like shown in Fig. 1.2.

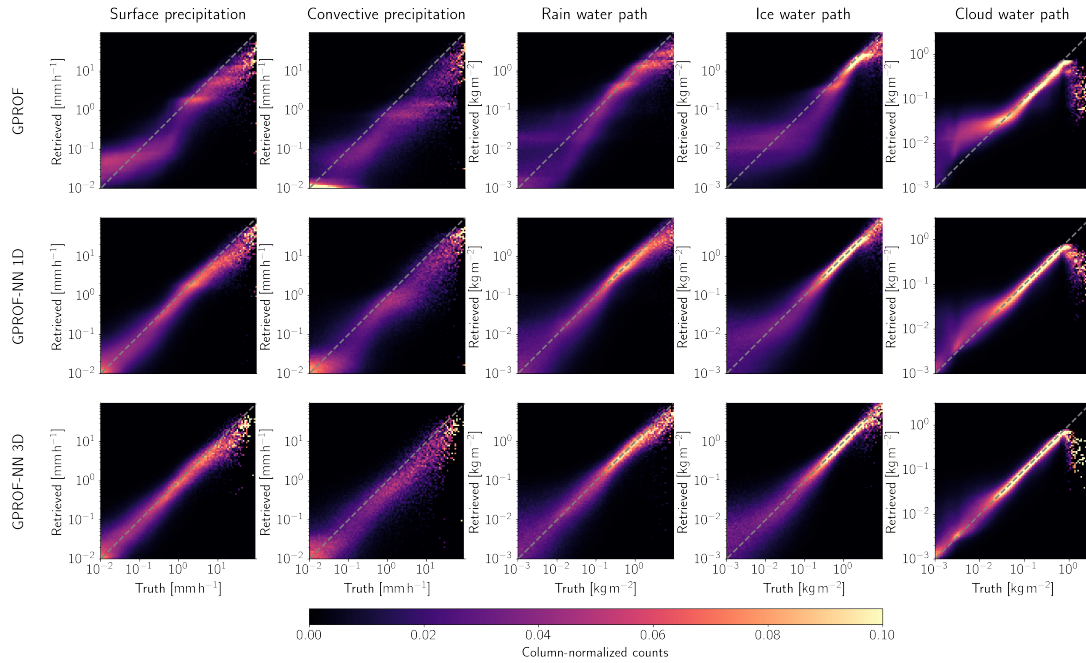

Figure 1.2: The updated Fig. 7, which will be included in the revised version of the manuscript.

**Reviewer comment 14**

Figure 8 and the associated discussions in this section: The authors mentioned that they have used 18 surfaces classed. Did they regroup the precipitation over different surface types in order to report the statistics? Or here they just report 4 types out of 18? How do the proposed models perform on arid land surface types?

**Author response:**

We regrouped the land surface classes for Fig. 8 because we considered the plot to be too busy with all 18 classes included. We will add an explanation of the regrouping in the text.

The GPROF surface classes do not have an explicit class for arid surfaces but instead a range of classes of increasingly dense vegetation cover. To accommodate the reviewer's suggestion, we will split the 'vegetation' group into densely and sparsely vegetated surfaces.

**Changes in manuscript:**

- We will add the following sentence to the description of Fig. 8.



**Changes starting in line 323:**

The figure displays bias, MSE, MAE and SMAPE for the most relevant classes of, SMAPE, and correlation for principal surface types. The original GPROF surface types have been grouped into ocean (surface type 1), dense vegetation (surface types 3 - 5), sparse vegetation (6 - 7), snow (surface types 8-11), and coast (surface types 12-15).

- We will update the figure to display the accuracy over densely and sparsely vegetated land. The updated plot is shown in Fig. 1.3.

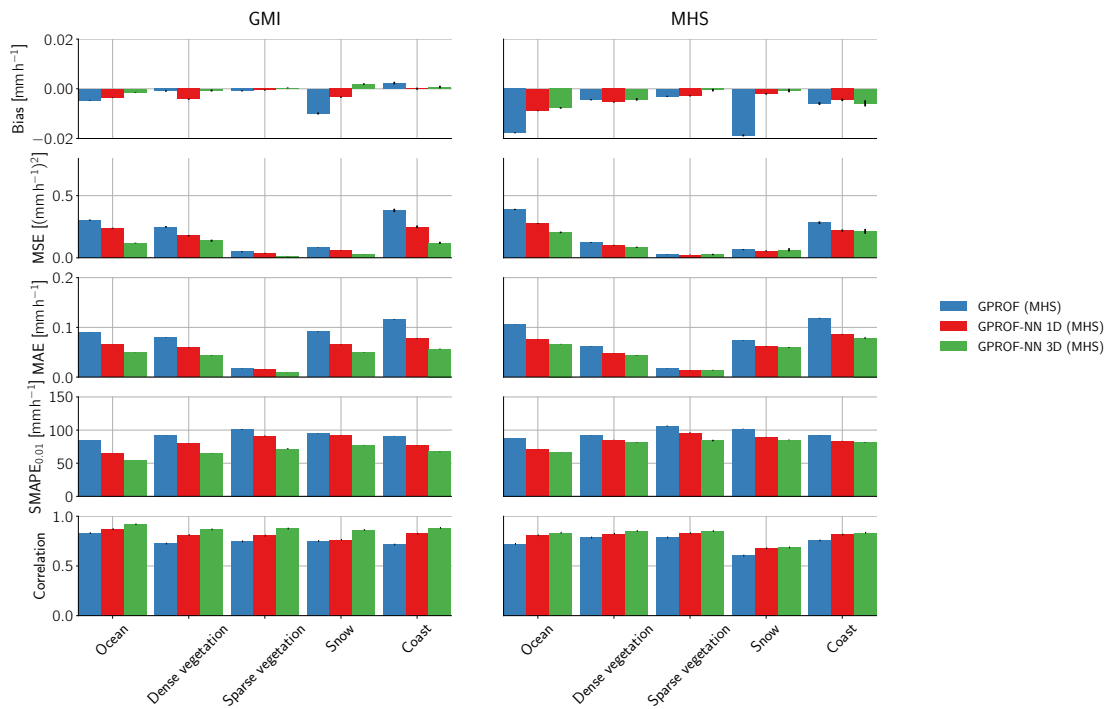

Figure 1.3: The updated Fig. 8 from the original manuscript.

**Reviewer comment 15**

Line 303: Again, how many samples are used to calculate Bias, MSE, etc in each pixels/5-degree box?

**Author response:**

We will add an additional row of panels to the plot that shows the number of samples in each bin.

**Changes in manuscript:**

- Fig. 9 and Fig. A1 will be updated. The updated figures are shown in Fig. 1.4 and Fig. 1.5, respectively.

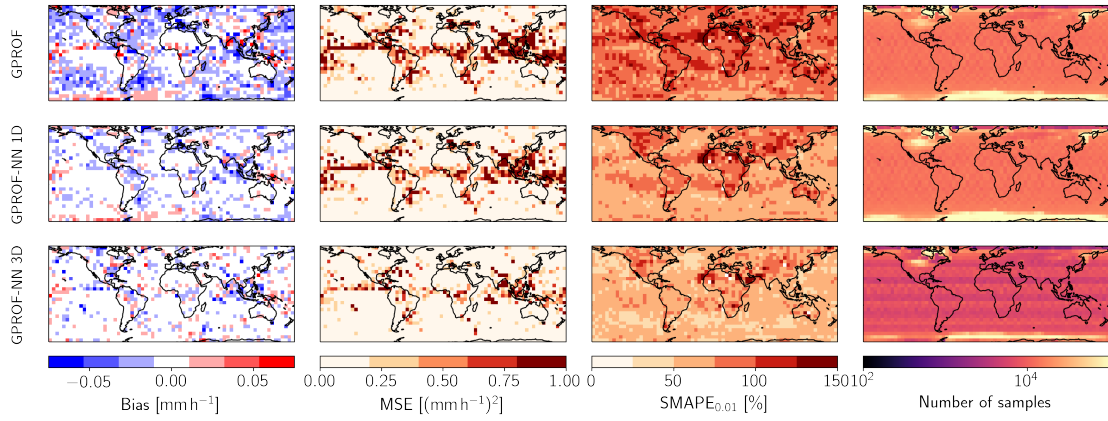

Figure 1.4: The updated Fig. 9, which will be included in the revised manuscript.

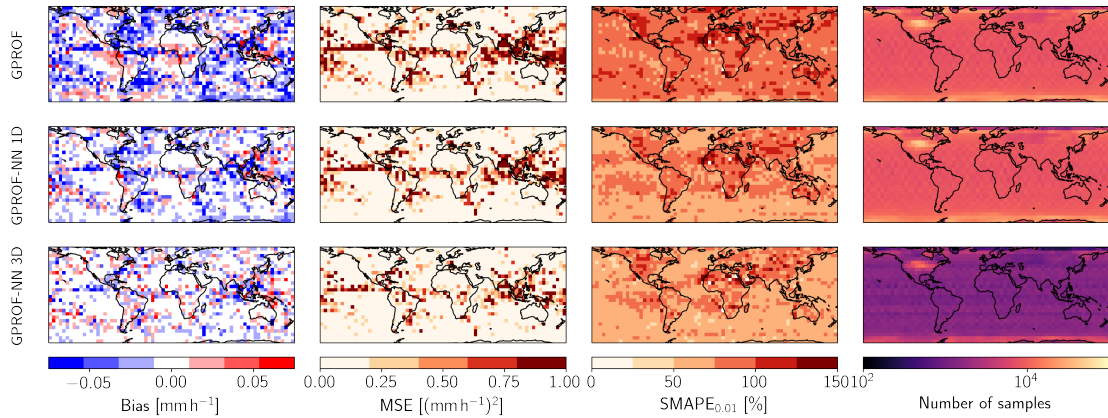

Figure 1.5: The updated Fig. A1, which will be included in the revised manuscript.

**Reviewer comment 16**

Section 3.2: This section presents a visualization of precipitation rates over one or two orbital tracks during Hurricane Harvey. Would you please report some basic statistical indices such as the probability of detection, missed ratio, etc.

**Author response:**

We will add tables with the requested statistics to the evaluation.

**Changes in manuscript:**

- We will add two tables shown in Tab. 1.3 and Tab. 1.4 which the Bias, MSE, MAE, Correlation, Precision and Recall for the GMI and MHS overpasses, respectively
- The discussion of the results in Sec. 3.2 will be rewritten to include these new results.

**Changes starting in line 420:**

A quantitative assessment of the retrieval results is provided in Tab. 7, which shows bias, MSE and correlation as well as the precision and recall of the retrieved precipitation flag. The precision is just the fraction of correctly detected raining pixels of all pixels predicted to be raining and the recall is the fraction of all raining that is correctly detected.

All statistics were calculate using both the CMB product and the MRMS ground-based measurements as reference. The reference measurements were averaged to the footprint of the GMI 18.7 GHz channel taking into account the rotation of the pixels across the swath. Only measurements with a radar quality index exceeding 0.8 were used for the comparison against MRMS retrievals.

The accuracy of all retrievals is lower when compared to MRMS than when compared to CMB. This is likely because all GPROF retrievals are designed to reproduce the retrieval database, which is to large extent derived from the CMB product. The GPROF-NN retrievals yield more accurate results than GPROF across all considered metrics except for the recall, which is ~~inline with the analysis of the effective resolution of the retrievals~~ lower for GPROF-NN 1D than for GPROF. Interestingly, GPROF-NN 1D achieves lower MAE, MSE and Bias as well as higher correlation in the comparison against MRMS, while the two perform very similar in the comparison against CMB.

**Changes starting in line 439:**

Accuracy metrics for the comparison of the MHS retrievals with MRMS are shown in Tab. 1.3. The MRMS measurements were averaged to the MHS observation footprints taking into account the changes in footprint size and shape across the swath. For MHS, GPROF has the lowest Bias, MAE and MSE as well and higher recall than GPROF-NN 1D. These results do not show any clear improvements for the GPROF-NN retrievals. However, the GPROF-NN 3D retrievals nonetheless improves the retrieval in terms of all metrics compared to GPROF-NN 1D, suggesting that the GPROF-NN 3D is able to make use of the spatial information in the observations despite being

trained on simulated observations.

Table 1.3: Accuracy metrics for surface precipitation retrieved from GMI PMW observations of hurricane Harvey for the overpass on 2017-08-25 at 11:50:00 UTC. Each metric is calculated with respect to the surface precipitation from the CMB product as well as the surface precipitation from MRMS as reference.

| Retrieval   | Bias [ $\text{mm h}^{-1}$ ] |       | MSE [ $(\text{mm h}^{-1})^2$ ] |       | Correlation |       | Precision |      | Recall |      |
|-------------|-----------------------------|-------|--------------------------------|-------|-------------|-------|-----------|------|--------|------|
|             | CMB                         | MRMS  | CMB                            | MRMS  | CMB         | MRMS  | CMB       | MRMS | CMB    | MRMS |
| GPROF       | 0.346                       | 0.355 | 2.691                          | 8.299 | 0.892       | 0.651 | 0.9       | 0.82 | 0.82   | 0.8  |
| GPROF-NN 1D | 0.245                       | 0.145 | 1.944                          | 4.927 | 0.914       | 0.701 | 0.95      | 0.9  | 0.90   | 0.7  |
| GPROF-NN 3D | 0.248                       | 0.184 | 1.953                          | 6.12  | 0.923       | 0.676 | 0.95      | 0.9  | 0.90   | 0.8  |

Table 1.4: Accuracy metrics for surface precipitation retrieved from MHS PMW observations of hurricane Harvey for the overpass on 2017-08-25 at 13:58 UTC. The metrics calculated against the MRMS surface precipitation estimates.

| Retrieval   | Bias [ $\text{mm h}^{-1}$ ] | MSE [ $(\text{mm h}^{-1})^2$ ] | Correlation | Precision | Recall |
|-------------|-----------------------------|--------------------------------|-------------|-----------|--------|
| GPROF       | 0.11                        | 2.602                          | 0.749       | 0.88      | 0.12   |
| GPROF-NN 1D | 0.259                       | 4.031                          | 0.751       | 0.9057    | 0.094  |
| GPROF-NN 3D | 0.152                       | 3.168                          | 0.759       | 0.948     | 0.052  |

### Reviewer comment 17

Figures 13 and 14. Please show CMB and MRMS products in both figures. Please use the commonly used blue red colorbar and colormap for presenting precipitation rates. Revise the figure in a way that the rain rates less than 1 mm/h are not eliminated. I see that the figures are patchy, and the spatial patterns of precipitation rates are not obvious. Please remove the colorful background from figure 14. and again, it is miss leading when the precipitation rates less than 1 mm/h in panels c, d, g, h is not shown in the figures.

### Author response:

While it is not possible to show the CMB product for the overpass of MHS since the GPM overpass occurred at a different time, we will add the MRMS measurements to the GPM overpass. Moreover, we will revise the plots to show precipitation rates across the full swaths on a logarithmic color scale without omitting the precipitation rates less than 1 mm/h.

We will not change the colormap to jet plots based on the arguments presented in the response to comment 12.

**Change in manuscript:**

We will update Fig. 13 and Fig. 14 according to the reviewers suggestions. The updated figures are shown in Fig. 1.6 and Fig. 1.7, respectively.

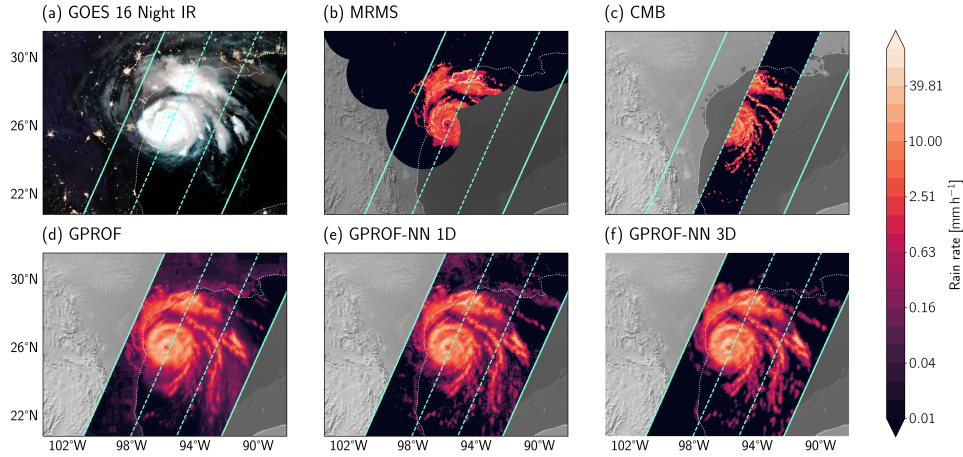

Figure 1.6: The updated Fig. 13, which will be included in the revised manuscript.

**Reviewer comment 18**

Section 3.3 as mentioned before, I suggest removing this part or please add more information for different stages of developing NN 1D and NN 3D models, to avoid confusion for the readers. I understand that GPUs, TPUs, etc. can be used to train deep neural networks, and the processing time when everything is ready for the model can be fast for pixel-wise NN 1D. Using NN 3D may be relatively fast in precipitation estimation (prediction phase), but the data preprocessing takes time and is not mentioned here.

**Author response:**

See response to comment 5.

**Reviewer comment 19**

Line 413, 461: Please avoid using “simply” replacing or developing. It is not simple!

**Author response:**

We will rewrite this sentence in the revised version of the manuscript.

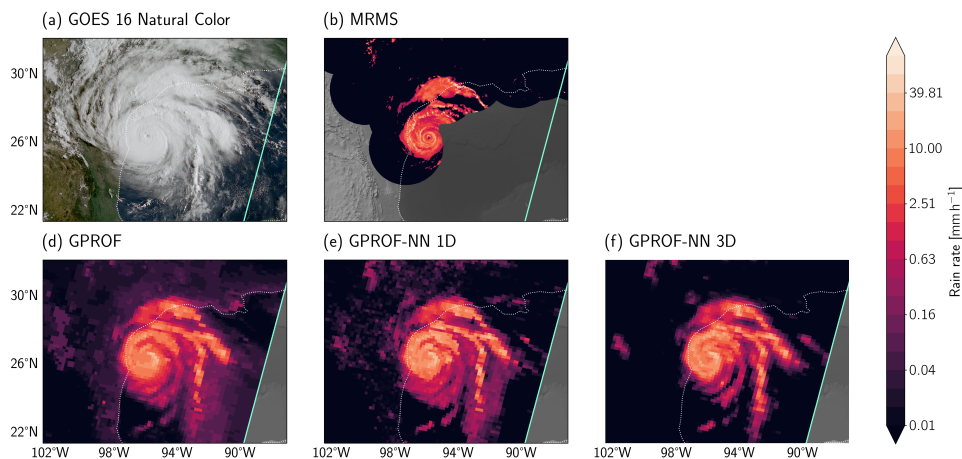

Figure 1.7: The updated Fig. 14, which will be included in the revised manuscript.

## Changes in manuscript

### Changes starting in line 461:

The evaluation of the GPROF-NN 1D algorithm against GPROF, showed that retrieval accuracy as well as effective resolution can be improved ~~simply~~ by replacing the current retrieval method with a fully-connected neural network.

### Changes starting in line 421:

~~In addition to the benefits of simply~~ Both GPROF-NN retrievals have been designed as a drop-in replacement for GPROF and can be directly used in the operational GPM processing pipeline. The results presented in this study show that, given a perfect retrieval database, considerable improvements in the accuracy of GPROF can be achieved by replacing the current retrieval scheme with an identical neural network Bayesian scheme with a deep neural network that processes pixels independently.

## Reviewer comment 20

Line 440: Again, please review the study by Li et al. 2021 and more recent ones that use CNN and PMW data are a PMW data are a part of their input datasets. It is worth mentioning previous works at least in the introduction. Also, it is already established that using neighboring information (spatial features) improves the satellite retrievals both in capturing the amount and the location of events.

- Li, Z., Wen, Y., Schreier, M., Behrangi, A., Hong, Y. and Lambrigtsen, B., 2021. Advancing satellite precipitation retrievals with data-driven approaches: Is black

box model explainable?. Earth and Space Science, 8(2), p.e2020EA001423.

- Afzali Goroooh, V., Akbari Asanjan, A., Nguyen, P., Hsu, K. and Sorooshian, S., 2022. Deep neural network high SpatioTEmporal resolution Precipitation estimation (Deep-STEP) using Passive Microwave and Infrared Data. Journal of Hydrometeorology.

and many more,...

#### Author response:

It was, of course, not our intent to claim that we were the first to make use of spatial information in a PMW retrieval. We will reformulate this paragraph to avoid this misunderstanding.

#### Changes in manuscript:

##### Changes starting in line 509:

~~The use of structural information for precipitation retrievals is common practice in algorithms based on infrared observations (Sorooshian et al., 2000; Hong et al., 2004) and the potential benefits of CNN based retrievals have been shown in Sadeghi et al. (2019). While basic structural information has been used in earlier PMW precipitation retrieval algorithms, as e.g. by Kummerow and Giglio (1994), we are not aware of any other operational PMW algorithms that incorporate structural information using CNNs. Because precipitation exhibits distinct spatial patterns in satellite observations, many algorithms make use of this information to improve precipitation retrievals (Kummerow and Giglio, 1994; Sorooshian et al., 2000; Hong et al., 2004). Our results confirm that CNNs learn to leverage this information directly from the satellite imagery and that it can notably improve the retrieval accuracy, which is in agreement with the findings from other precipitation retrievals that employ CNNs (Tang et al., 2018; Sadeghi et al., 2019).~~

#### 1.2.1 Reviewer comment 21

Line 440-445, 452: No evidence has been reported or shown that the model is trained properly. At least please mention the number of samples in the training and testing process, how do the authors select the hyperparameters? How many parameters do the NN models have compared to GPROF? The Hurricane Harvey event was just a visual representation of retrievals. By adding statistic indices such as pixel- or window-wise correlation, false alarm, missed ratio, etc., the reader can find the improvements and the differences (not only by reporting average bias and visual assessments).

### Author response:

The results presented in Sec. 3 of the manuscript clearly show that the neural networks achieve higher retrieval accuracy on the unseen test data than GPROF. This would not be possible if the networks weren't trained properly. While the assessment of the retrievals over hurricane Harvey can give some indication over how well the retrievals work, a quantitative assessment against independent measurements has to be interpreted carefully because the reference measurements will themselves be affected by uncertainties. In addition to that, the the MHS retrievals are affected by simulation errors, which may limit the accuracy of the GPROF-NN retrievals.

We will reformulate the discussion of the overpasses to emphasize the above points. As mentioned in the response to comment 17, we will extend the evaluation of the hurricane Harvey overpasses to include the requested metrics. We will also include the sizes of the GPROF-NN neural networks and the training data in the new section in the appendix that describes the training data.

### Changes in manuscript

- We will add tables with the requested statistics to the assessment of the Hurricane overpasses. See response to reviewer comment 16.
- The discussion of the results from the hurricane overpasses will be extended as follows.

#### Changes starting in line 457:

The quantitative assessment of the accuracy of the MHS retrievals of hurricane Harvey did not show any clear improvements for the GPROF-NN retrievals compared to GPROF. This can be due to multiple reasons. Firstly, the hurricane constitutes an extreme event and it is likely that the instantaneous MRMS precipitation rates used as reference measurements are themselves affected by considerable uncertainties. Secondly, given that the bulk of the precipitation in the considered scene is intense and over ocean, GPROF can be expected to work well. This makes it less likely to find clear improvements in this particular scenario. Finally, the accuracy of the neural-network based retrievals may be limited by the modeling error of the simulations in the retrieval database. In principle, simulation errors could even cause the GPROF-NN retrievals to be less accurate than GPROF for real observations. Should this really be the case, the demonstrated potential of the GPROF-NN retrievals would imply that the quality of the simulations in the GPROF database limits the accuracy of the GPM PMW precipitation measurements and that future work to should focus on improving the simulations.

- The number of parameters of the models will be included in the newly added Sec. B2 in the appendix that described the training of the neural network models.



### 1.2.2 Reviewer comment 22

Line 455: Quoting from the manuscript “an additional neural network model was required to transform the data from the retrieval database into a form that is amenable for training a CNN...”, I invite the authors to clearly explain the process in the manuscript. It is not clear!

#### **Author response:**

We will add an extended description of the generation of the training data in the revised version of the manuscript. It will describe the intermediate retrieval that is used to generate the training data for sensors other than GMI.

#### **Changes in manuscript**

- Section B1 will be added to the manuscript, which describes the generation of the training data for all sensors including the retrieval used to extend the simulated brightness temperatures.

### 1.2.3 Reviewer comment 23

Line 477: I suggest replacing “warming climate” with something like changing climate.

#### **Author response:**

While we acknowledge the reviewer’s suggestion, we are not aware of any objective arguments for such a change and will therefore not implement it in the revised version of the manuscript.

# Bibliography

- Borland, D. and Ii, R. M. T.: Rainbow color map (still) considered harmful, *IEEE computer graphics and applications*, 27, 14–17, 2007.
- Duncan, D. I., Eriksson, P., and Pfreundschuh, S.: An experimental 2D-Var retrieval using AMSR2, *Atmospheric Measurement Techniques*, 12, 6341–6359, <https://doi.org/10.5194/amt-12-6341-2019>, 2019.
- Gopalan, K., Wang, N.-Y., Ferraro, R., and Liu, C.: Status of the TRMM 2A12 Land Precipitation Algorithm, *Journal of Atmospheric and Oceanic Technology*, 27, 1343 – 1354, <https://doi.org/10.1175/2010JTECHA1454.1>, 2010.
- Goroooh, V. A., Asanjan, A. A., Nguyen, P., Hsu, K., and Sorooshian, S.: Deep Neural Network High Spatiotemporal Resolution Precipitation Estimation (Deep-STEP) Using Passive Microwave and Infrared Data, *Journal of Hydrometeorology*, 23, 597 – 617, <https://doi.org/10.1175/JHM-D-21-0194.1>, 2022.
- Hong, Y., Hsu, K. L., Sorooshian, S., and Gao, X. G.: Precipitation estimation from remotely sensed imagery using an artificial neural network cloud classification system, *J. Appl. Meteor.*, 43, 1834–1852, 2004.
- Jumper, J., Evans, R., Pritzel, A., Green, T., Figurnov, M., Ronneberger, O., Tunyasuvunakool, K., Bates, R., Žídek, A., Potapenko, A., et al.: Highly accurate protein structure prediction with AlphaFold, *Nature*, 596, 583–589, 2021.
- Kummerow, C. and Giglio, L.: A Passive Microwave Technique for Estimating Rainfall and Vertical Structure Information from Space. Part I: Algorithm Description, *Journal of Applied Meteorology and Climatology*, 33, 3 – 18, [https://doi.org/10.1175/1520-0450\(1994\)033<0003:APMTFE>2.0.CO;2](https://doi.org/10.1175/1520-0450(1994)033<0003:APMTFE>2.0.CO;2), 1994.
- Li, Z., Wen, Y., Schreier, M., Behrangi, A., Hong, Y., and Lambregtsen, B.: Advancing Satellite Precipitation Retrievals With Data Driven Approaches: Is Black Box Model Explainable?, *Earth and Space Science*, 8, e2020EA001423, <https://doi.org/https://doi.org/10.1029/2020EA001423>, e2020EA001423 2020EA001423, 2021.
- matplotlib: Choosing Colormaps in Matplotlib, <https://matplotlib.org/stable/tutorials/colors/colormaps.htm>, 2022.
- Moraux, A., Dewitte, S., Cornelis, B., and Munteanu, A.: Deep Learning for Precipitation Estimation from Satellite and Rain Gauges Measurements, *Remote Sensing*, 11, <https://doi.org/10.3390/rs11212463>, 2019.

- Passive Microwave Algorithm Team Facility: GLOBAL PRECIPITATION MEASUREMENT (GPM) MISSION, [https://gpm.nasa.gov/sites/default/files/2022-06/ATBD\\_GPM\\_V7\\_GPROF.pdf](https://gpm.nasa.gov/sites/default/files/2022-06/ATBD_GPM_V7_GPROF.pdf), 2022.
- Pfreundschuh, S., Eriksson, P., Duncan, D., Rydberg, B., Håkansson, N., and Thoss, A.: A neural network approach to estimating a posteriori distributions of Bayesian retrieval problems, *Atmos. Meas. Tech.*, 11, 4627–4643, <https://doi.org/10.5194/amt-11-4627-2018>, 2018.
- Sadeghi, M., Asanjan, A. A., Faridzad, M., Nguyen, P., Hsu, K., Sorooshian, S., and Braithwaite, D.: PERSIANN-CNN: Precipitation estimation from remotely sensed information using artificial neural networks–convolutional neural networks, *Journal of Hydrometeorology*, 20, 2273–2289, 2019.
- Sanò, P., Panegrossi, G., Casella, D., Di Paola, F., Milani, L., Mugnai, A., Petracca, M., and Dietrich, S.: The Passive microwave Neural network Precipitation Retrieval (PNPR) algorithm for AMSU/MHS observations: description and application to European case studies, *Atmospheric Measurement Techniques*, 8, 837–857, 2015.
- Sanò, P., Panegrossi, G., Casella, D., Marra, A. C., Di Paola, F., and Dietrich, S.: The new Passive microwave Neural network Precipitation Retrieval (PNPR) algorithm for the cross-track scanning ATMS radiometer: description and verification study over Europe and Africa using GPM and TRMM spaceborne radars, *Atmospheric Measurement Techniques*, 9, 5441–5460, <https://doi.org/10.5194/amt-9-5441-2016>, 2016.
- Sanò, P., Panegrossi, G., Casella, D., Marra, A. C., D’Adderio, L. P., Rysman, J. F., and Dietrich, S.: The passive microwave neural network precipitation retrieval (PNPR) algorithm for the CONICAL scanning Global Microwave Imager (GMI) radiometer, *Remote Sensing*, 10, 1122, 2018.
- Silver, D., Huang, A., Maddison, C. J., Guez, A., Sifre, L., Van Den Driessche, G., Schrittwieser, J., Antonoglou, I., Panneershelvam, V., Lanctot, M., et al.: Mastering the game of Go with deep neural networks and tree search, *nature*, 529, 484–489, 2016.
- Sorooshian, S., Hsu, K. L., Gao, X., Gupta, H. V., Imam, B., and Braithwaite, D.: Evaluation of PERSIANN system satellite based estimates of tropical rainfall, *Bull. Amer. Meteor. Soc.*, 81, 2035–2046, 2000.
- Staelin, D. and Chen, F.: Precipitation observations near 54 and 183 GHz using the NOAA-15 satellite, *IEEE Transactions on Geoscience and Remote Sensing*, 38, 2322–2332, <https://doi.org/10.1109/36.868889>, 2000.
- Surussavadee, C. and Staelin, D. H.: Global Millimeter-Wave Precipitation Retrievals Trained With a Cloud-Resolving Numerical Weather Prediction Model, Part I: Retrieval Design, *IEEE Transactions on Geoscience and Remote Sensing*, 46, 99–108, <https://doi.org/10.1109/TGRS.2007.908302>, 2008.

- Tang, G., Long, D., Behrangi, A., Wang, C., and Hong, Y.: Exploring Deep Neural Networks to Retrieve Rain and Snow in High Latitudes Using Multisensor and Reanalysis Data, *Water Resources Research*, 54, 8253–8278, <https://doi.org/https://doi.org/10.1029/2018WR023830>, 2018.
- Thyng, K. M., Greene, C. A., Hetland, R. D., Zimmerle, H. M., and DiMarco, S. F.: True Colors of Oceanography: Guidelines for Effective and Accurate Colormap Selection, *Oceanography*, 29, 9–13, URL <http://www.jstor.org/stable/24862699>, 2016.
- Utsumi, N., Turk, F. J., Haddad, Z. S., Kirstetter, P.-E., and Kim, H.: Evaluation of Precipitation Vertical Profiles Estimated by GPM-Era Satellite-Based Passive Microwave Retrievals, *Journal of Hydrometeorology*, 22, 95 – 112, <https://doi.org/10.1175/JHM-D-20-0160.1>, 2021.
